# Supplementary material for: External validation of blood eosinophils, FE NO and serum periostin as surrogates for sputum eosinophils in asthma
Source: HighWire-hosted journal article supplement (doi:10.1136/thoraxjnl-2014-205634), 2014-11-24

**ONLINE REPOSITORY**

**TITLE PAGE**

**External validation of serum periostin, FeNO, and blood eosinophils as  
surrogates for sputum eosinophils in asthma**

A.H. Wagener<sup>1\*</sup>, S.B. de Nijs<sup>1\*</sup>, R. Lutter<sup>1,2</sup>, A.R. Sousa<sup>3</sup>, E.J.M. Weersink<sup>1</sup>, E.H. Bel<sup>1</sup>, P.J.  
Sterk<sup>1</sup>

\* Both author contributed equally to the manuscript

<sup>1</sup>Department of Respiratory Medicine

<sup>2</sup>Department of Experimental Immunology

Academic Medical Center (AMC)

University of Amsterdam

The Netherlands

<sup>3</sup>Respiratory Therapy Unit

GlaxoSmithKline

London, United Kingdom

Corresponding author:

A.H. Wagener, MD

Department of Respiratory Medicine, F5-260

Academic Medical Center (AMC)

University of Amsterdam

Meibergdreef 9

1105 AZ Amsterdam

The Netherlands

## METHODS

### *In-house periostin assay set up and quality*

Serum periostin was measured by ELISA (duoset DY3548: R&D systems) using poly-HRP (Sanquin, Amsterdam, the Netherlands) for amplification. In short, capture antibody (100  $\mu$ l/well; 1  $\mu$ g/ml) was incubated overnight in a NUNC 96-well ELISA plate at room temperature. After 3 washes with phosphate-buffered saline (PBS) pH 7.4 and 0.2% Tween-20 (PBST), remaining binding sites were blocked using 0.5% non-fat milk in PBS (150  $\mu$ l/well) for 30 min. After 3 washes with PBST, standard curve (10,000 pg/ml till 39 pg/ml; 1 to 1 dilutions), samples (1 in 40 and 1 in 80 dilution) and internal controls were added (100  $\mu$ l/well) and incubated for 2h, followed by three washes with PBST. Subsequently, detecting antibody (100  $\mu$ l; 2  $\mu$ g/ml) was added and left for 1h. After another 3 washes with PBST, 100  $\mu$ l of a 1 in 10,000 dilution of poly-HRP (Sanquin, the Netherlands) in PBS with 0.5% non-fat milk in PBS was added and incubated for 30 min. After 4 washes with PBST the plates were developed using tetra-methyl benzidine and stopped with sulphuric acid. Incubations were at 500 rpm, at room temperature and in the dark, unless indicated otherwise. This in-house ELISA for periostin was validated for measurement of periostin in serum by serial dilutions (10x, 20x, 40x and 80x diluted;  $\pm$  15.5% variation) and spike recovery (77.75%  $\pm$  11.69%; (mean  $\pm$  SD)). The intra- and inter-assay coefficients of variability were 12.3% (9.08%  $\pm$  3.91%; (mean  $\pm$  SD)) and 17.4% (12.69%  $\pm$  4.08%), respectively.

### *Western blot of periostin isoforms*

Serum samples with high and low periostin were run on 10% polyacrylamide gels under reducing conditions with SDS. In some experiments serum proteins were concentrated by precipitation using 15 (w/v) TCA and carefully solubilized in Laemmli sample buffer before layering. After separation proteins were transferred to PVDF membranes, blocked with milk

powder in PBS tween-20 buffer and developed using a goat polyclonal periostin purified detecting antibody followed by an anti-goat secondary antibody (1:15000; LI-COR Biosciences). Membranes were scanned and quantified using the Odyssey Infrared Imaging system (LI-COR Biosciences).

## Results

### *Western blot of periostin isoforms*

No isoforms of periostin were detected in (up to 10-fold concentrated) serum using Western blotting with a goat polyclonal antibody (R&D; AF3548) affinity-purified on periostin (Asn22-Gln836).

### *Serum periostin analyses by Elecsys® Periostin*

In conjunction with our data, serum periostin analyses using the Elecsys® Periostin assay showed similar results. In the external validation cohort there was a weak but significant correlation between serum periostin and sputum eosinophil percentages ( $r=0.32$ ,  $p=0.001$ ), whereas in the replication cohort there was no significant correlation ( $r=0.28$ ,  $p=0.1$ ).

The diagnostic accuracy of serum periostin to differentiate eosinophilic from non-eosinophilic airway inflammation using 3% sputum eosinophils as threshold, described as ROC AUC, was 62% ( $p=0.09$ , 95% CI: 0.48-0.75) in the external validation cohort and 55% ( $p=0.6$ , 95% CI: 0.35-0.75) in the replication cohort (Figure E1).

**Table E1.** Patient characteristics stratified by sputum eosinophil percentages

|                                            | External validation cohort     |                               | Replication cohort             |                               |
|--------------------------------------------|--------------------------------|-------------------------------|--------------------------------|-------------------------------|
|                                            | Mild to moderate asthma        |                               | Moderate to severe asthma      |                               |
|                                            | EO $\geq$ 3%                   | EO < 3%                       | EO $\geq$ 3%                   | EO < 3%                       |
|                                            | n=30                           | n=80                          | n= 16                          | n= 21                         |
| Age (years)                                | 52 $\pm$ 14.0                  | 49 $\pm$ 13.6                 | 55 $\pm$ 9.1                   | 52 $\pm$ 12.9                 |
| Gender (% female)                          | 43                             | 54                            | 56                             | 48                            |
| BMI                                        | 28 $\pm$ 5.3                   | 28 $\pm$ 5.2                  | 31 $\pm$ 9.3                   | 29 $\pm$ 6.0                  |
| Smoking history (py) <sup>#</sup>          | 6 (0-17)                       | 4 (0-19)                      | 0 (0-7.5)                      | 0 (0-5)                       |
| Dose ICS ( $\mu$ g/day) <sup>#1</sup>      | 500 (250-500)                  | 250 (250-500)                 | 500 (500-1000)                 | 625 (500-1000)                |
| % positive RAST                            | 60 <sup>*</sup>                | 37 <sup>*</sup>               | 50                             | 62                            |
| Serum IgE (Ku/L) <sup>#</sup>              | 164 (34-262) <sup>*</sup>      | 54 (20-190) <sup>*</sup>      | 226 (35-383)                   | 153 (44-267)                  |
| pb FEV <sub>1</sub> , % pred               | 101 $\pm$ 18.5                 | 100 $\pm$ 16.6                | 86 $\pm$ 21.4                  | 94 $\pm$ 14.7                 |
| pb FEV <sub>1</sub> /FVC, % pred           | 92 $\pm$ 9.5                   | 96 $\pm$ 11.4                 | 82 $\pm$ 15.3                  | 88 $\pm$ 16.5                 |
| Blood eos, 10 <sup>9</sup> /l <sup>#</sup> | 0.38 (0.29-0.61) <sup>**</sup> | 0.14 (.09-0.20) <sup>**</sup> | 0.32 (0.23-0.48) <sup>**</sup> | 0.13 (.06-0.20) <sup>**</sup> |
| FeNO level, ppb <sup>#</sup>               | 55 (17-86) <sup>**</sup>       | 18 (13-32) <sup>**</sup>      | NA                             | NA                            |
| Periostin (in-house), ng/mL <sup>#</sup>   | 27 (21.2-32.9)                 | 25 (19.0-32.8)                | 42 (27.1-59.3)                 | 36 (29.1-49.4)                |
| Periostin (Genentech), ng/mL <sup>#</sup>  | 49.7 (42.4-62)                 | 45.3 (39.4-54.6)              | 56.8 (45.5-61.2)               | 49.1 (45.6-58)                |

Data expressed as mean  $\pm$  SD; <sup>#</sup> median (interquartile range); <sup>\*</sup>t-test p<0.05, <sup>\*\*</sup>t-test p<0.001

Abbreviations: Dose ICS=fluticason equivalent; pb=postbronchodilator; pbb= parts per billion;

NA=not available

**Table E2.** Sensitivity, specificity, PPV and NPV of different surrogate markers using alternative cut-points to diagnose eosinophilic airway inflammation (less or more or equal to 2% sputum eosinophils)

|                      | Threshold                 | Sensitivity | Specificity | PPV | NPV |
|----------------------|---------------------------|-------------|-------------|-----|-----|
| Blood eosinophils    | > 0.22 10 <sup>9</sup> /L | 83          | 82          | 70  | 90  |
| Blood eosinophils    | ≥ 0.25 10 <sup>9</sup> /L | 74          | 86          | 72  | 88  |
| Blood eosinophils    | ≥ 0.27 10 <sup>9</sup> /L | 69          | 92          | 80  | 86  |
| FeNO level           | > 20 ppb                  | 76          | 60          | 49  | 85  |
| FeNO level           | ≥ 24 ppb                  | 76          | 67          | 52  | 85  |
| FeNO level           | ≥ 42 ppb                  | 58          | 94          | 83  | 84  |
| FeNO level           | > 50 ppb                  | 48          | 94          | 80  | 80  |
| Periostin (in-house) | > 26 ng/ml                | 56          | 57          | 37  | 73  |

PPV= positive predictive value; NPV= negative predictive value

**Table E3. Replication cohort:** sensitivity, specificity, PPV and NPV of different surrogate markers using alternative cut-points to diagnose eosinophilic airway inflammation (less or more or equal to 3% sputum eosinophils)

|                      | Threshold                 | Sensitivity | Specificity | PPV | NPV |
|----------------------|---------------------------|-------------|-------------|-----|-----|
| Blood eosinophils    | > 0.22 10 <sup>9</sup> /L | 80          | 80          | 75  | 84  |
| Blood eosinophils    | ≥ 0.25 10 <sup>9</sup> /L | 67          | 85          | 77  | 77  |
| Blood eosinophils    | ≥ 0.27 10 <sup>9</sup> /L | 60          | 90          | 83  | 78  |
| Periostin (in-house) | > 36 ng/ml                | 56          | 67          | 50  | 65  |

PPV= positive predictive value; NPV= negative predictive value

### **Figure legends**

**Figure E1.** ROC curve analyses of the sensitivity and the specificity of serum periostin, using the Elecsys® Periostin assay, for the diagnosis of eosinophilic inflammation. **AUC** = area under the curve.

### Elecsys Periostin assay

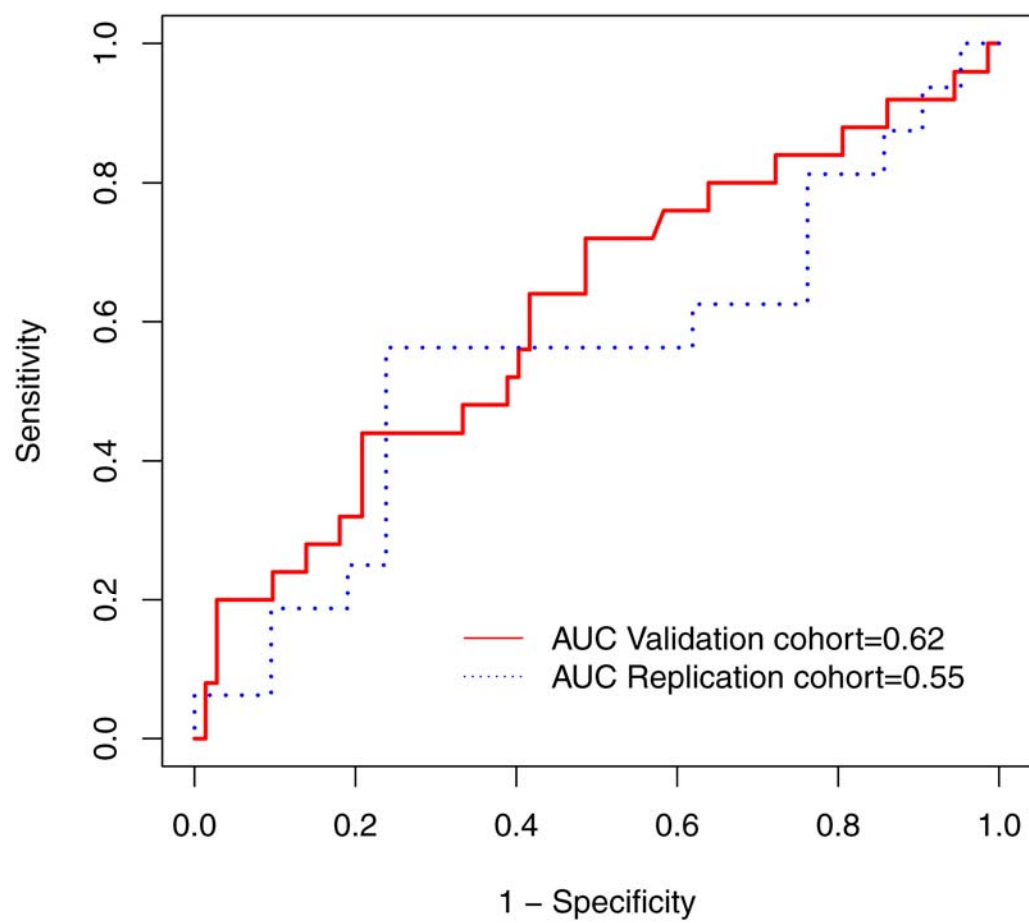

Supplement: thoraxjnl-2014-205634supp.pdf [file thoraxjnl-2014-205634supp.pdf]
